# Supplementary material for: Overexpression of CfICE1 from Cryptomeria fortunei Enhances Cold, Drought and Salt Stress in Poplar
Source: MDPI journal article supplement (doi:10.3390/ijms232315214), 2022-12-02

**Table S1.** Primers used in this study.

| Primer name           | Primer sequence (5'-3')                       | Application                           |
|-----------------------|-----------------------------------------------|---------------------------------------|
| <i>XbaI-CfICE1-F</i>  | gagaacacgggggactctagaATGTTCTCGAGAATGAACACTGGA | Amplification of the conserved region |
| <i>BamHI-CfICE1-R</i> | ggactgaccacccggggatccCATTGCAGAATGACAGCTTGCA   |                                       |
| RT- <i>CfICE1-F</i>   | TGCTCTTTAGGCCCAAGCAA                          | RT-PCR                                |
| RT- <i>CfICE1-R</i>   | GGCACCCACCGAAGGATAAA                          |                                       |
| <i>UBQ-F</i>          | GTTGATTTTGTCTGGGAAGC                          |                                       |
| <i>UBQ-R</i>          | GATCTTGGCCTTCACGTTGT                          |                                       |
| <i>RG1-F</i>          | AAACATTGGACGGGGTGCTC                          |                                       |
| <i>RG1-R</i>          | CCCACATGAGGCTGGAGGAC                          |                                       |
| <i>PbdCBF1-F</i>      | CGGATTCTGCTTGGAGGTTG                          |                                       |
| <i>PbdCBF1-R</i>      | TCAACTCACCTCCCTCACAC                          |                                       |
| <i>PbdCBF2-F</i>      | TCGGGTAAGTGGGTTTGTGA                          |                                       |
| <i>PbdCBF2-R</i>      | AGCAACATCATGTGCCCTTG                          |                                       |
| <i>PbdCBF3-F</i>      | GGGCGGAGGATATTCAAGGA                          |                                       |
| <i>PbdCBF3-R</i>      | GGATACGTGCCTAGCCAGAT                          |                                       |

**Figure S1.** Identification of transgenic plants by qRT-PCR. The figure shows the measured expression of each plant after treatment at 4 °C. According to the gene expression level and plant growth status, transgenic poplar 2 (35S::CfICE1-1), transgenic poplar 3(35S::CfICE1-2) and transgenic poplar 4 (35S::CfICE1-3) were finally selected to complete the experiment. Each bar indicates the average  $\pm$  SD (n = 3), and lowercase letters above each bar indicate significant differences ( $p \leq 0.05$ ).

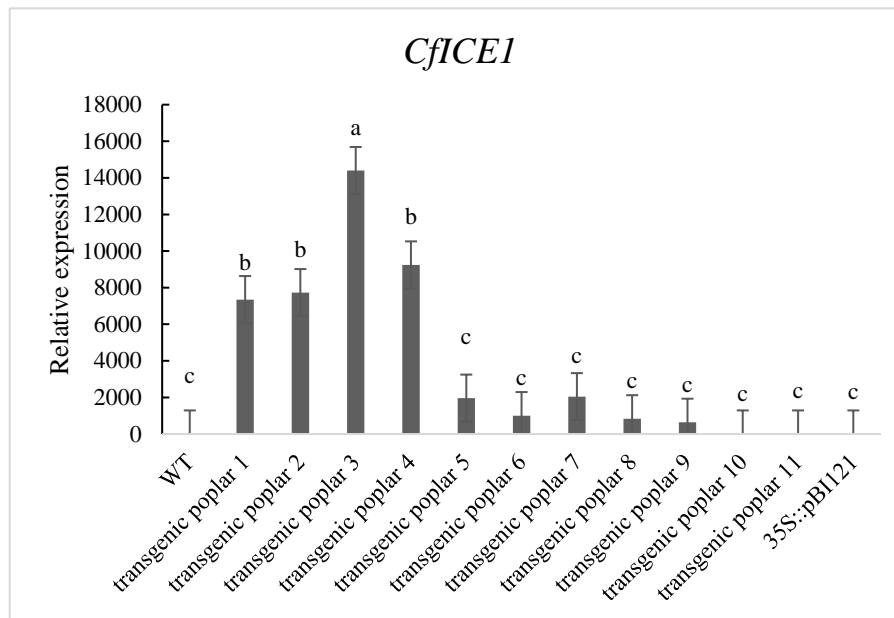

Supplement: s1 [file s1]
